# Supplementary material for: Estimating the Climate Niche of Sclerotinia sclerotiorum Using Maximum Entropy Modeling
Source: MDPI journal article supplement (doi:10.3390/jof9090892), 2023-08-31

Cohen, SD. 2023. Estimating the climate niche of *Sclerotinia sclerotiorum* using maximum entropy modeling

Figure S2. Maxent Jackknife Analysis of Environmental Variables

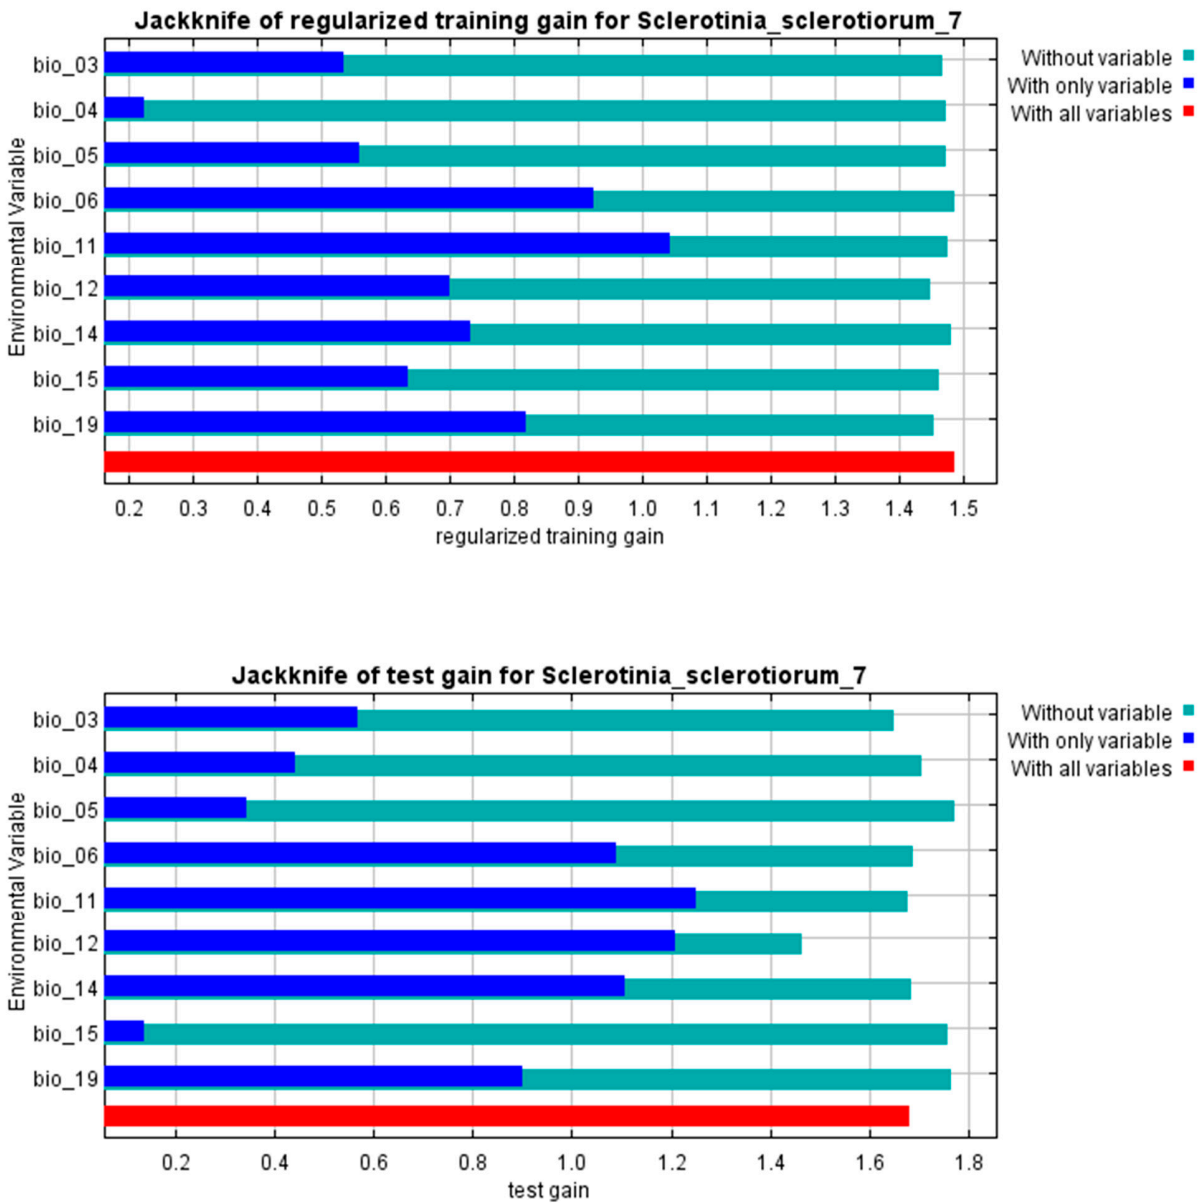

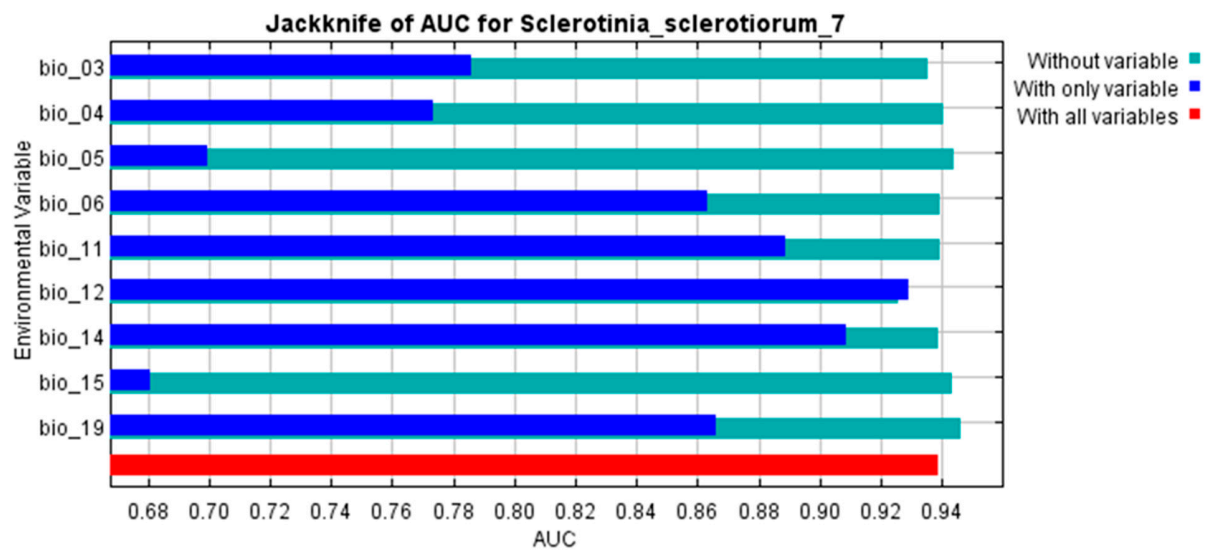

Supplement: s1 [file s1]
