# Supplementary material for: Estimating the Climate Niche of Sclerotinia sclerotiorum Using Maximum Entropy Modeling
Source: MDPI journal article supplement (doi:10.3390/jof9090892), 2023-08-31

Cohen, SD. 2023. Estimating the climate niche of *Sclerotinia sclerotiorum* using maximum entropy modeling

Figure S1. Maxent Random Model: Prediction Accuracy, Sensitivity and Specificity

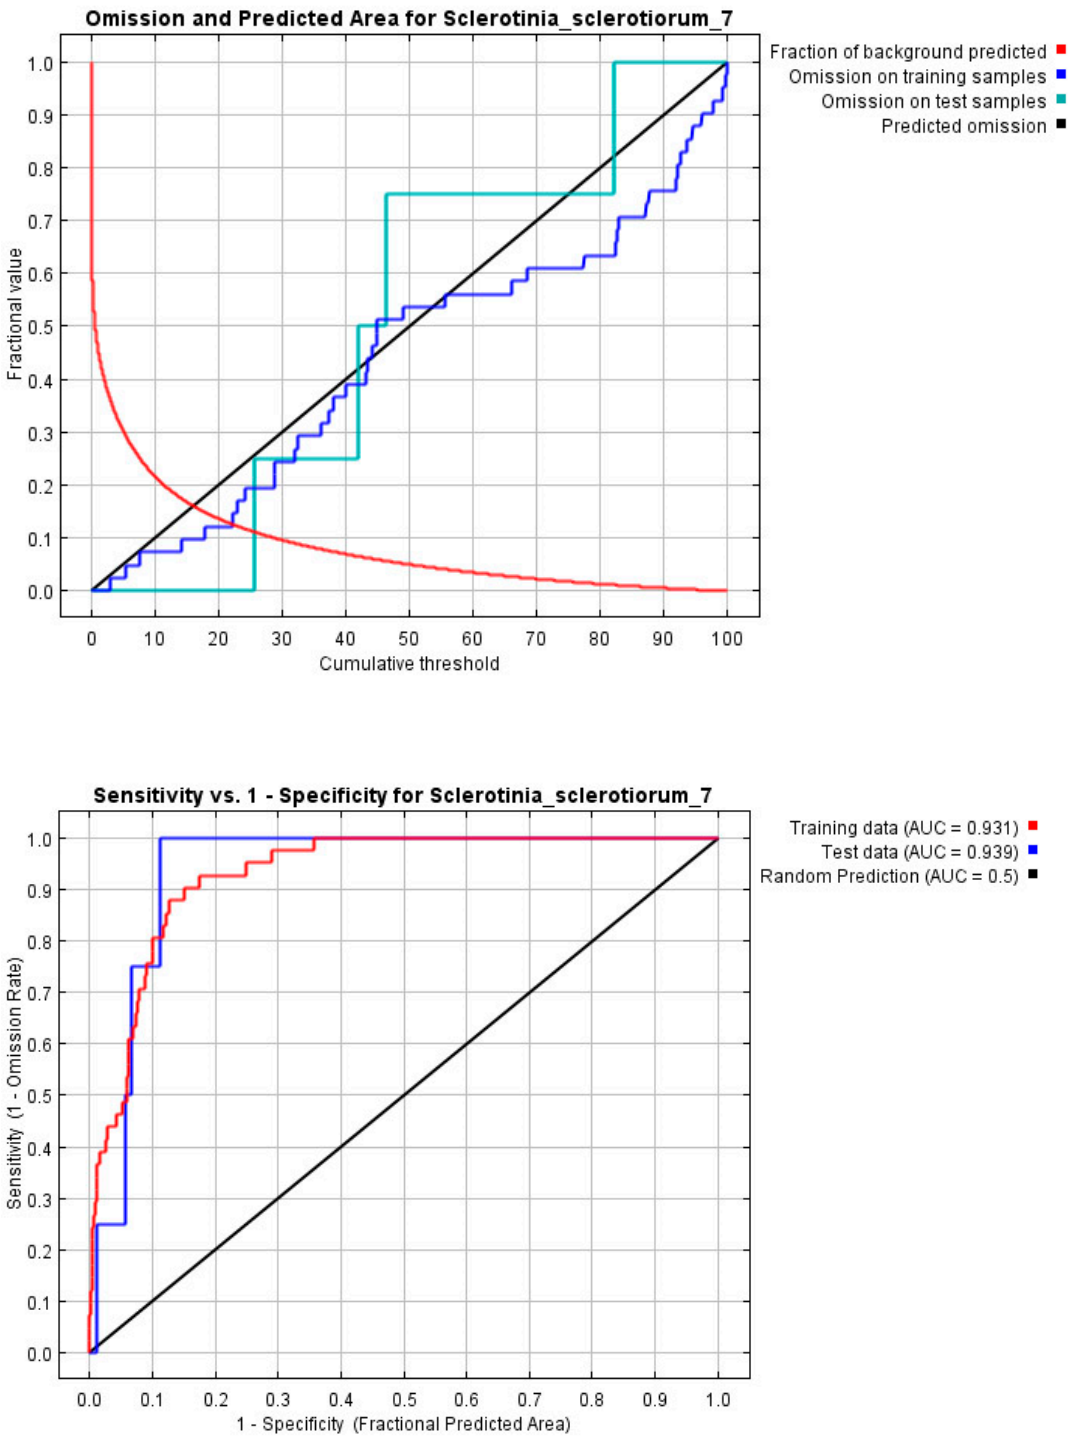

Supplement: s1 [file s1]
